# Supplementary material for: The neural development of empathy is sensitive to caregiving and early trauma
Source: PubMed Central journal article supplement (PMC6478745; doi:10.1038/s41467-019-09927-y), 2019-04-23
Supplement: 41467_2019_9927_MOESM1_ESM.pdf [file 41467_2019_9927_MOESM1_ESM.pdf]

## **Supplementary Information**

Contents: Supplementary Table 1

**Supplementary Table 1.** Pearson r correlation between networks' activation and other variables

| Variables                           | Empathy Response |        | Mentalizing / Reactivity |      |
|-------------------------------------|------------------|--------|--------------------------|------|
|                                     | r                | p      | r                        | p    |
| Synchrony                           | .34              | .002** | -.10                     | .34  |
| Reactivity                          | -.12             | .27    | .25                      | .03* |
| Empathy –<br>perspective-<br>taking | .05              | .62    | .005                     | .97  |
| Empathy –<br>arousal                | -.16             | .15    | -.002                    | .99  |
| Empathy –<br>valence                | .19              | .09    | .17                      | .14  |

^ The variables in both time points (T1 and T3) were highly correlated to each other ( $r = .60$ ,  $p < .0000001$ ).

\*\*  $P_{\text{FDR-corrected}} < 0.05$

\*  $P_{\text{FDR-uncorrected}} < 0.$
